# Supplementary material
Source: HighWire-hosted journal article supplement (https://www.g3journal.org/content/suppl/2013/10/17/g3.113.008185)
Supplement: FigureS3.pdf [file FigureS3.pdf]

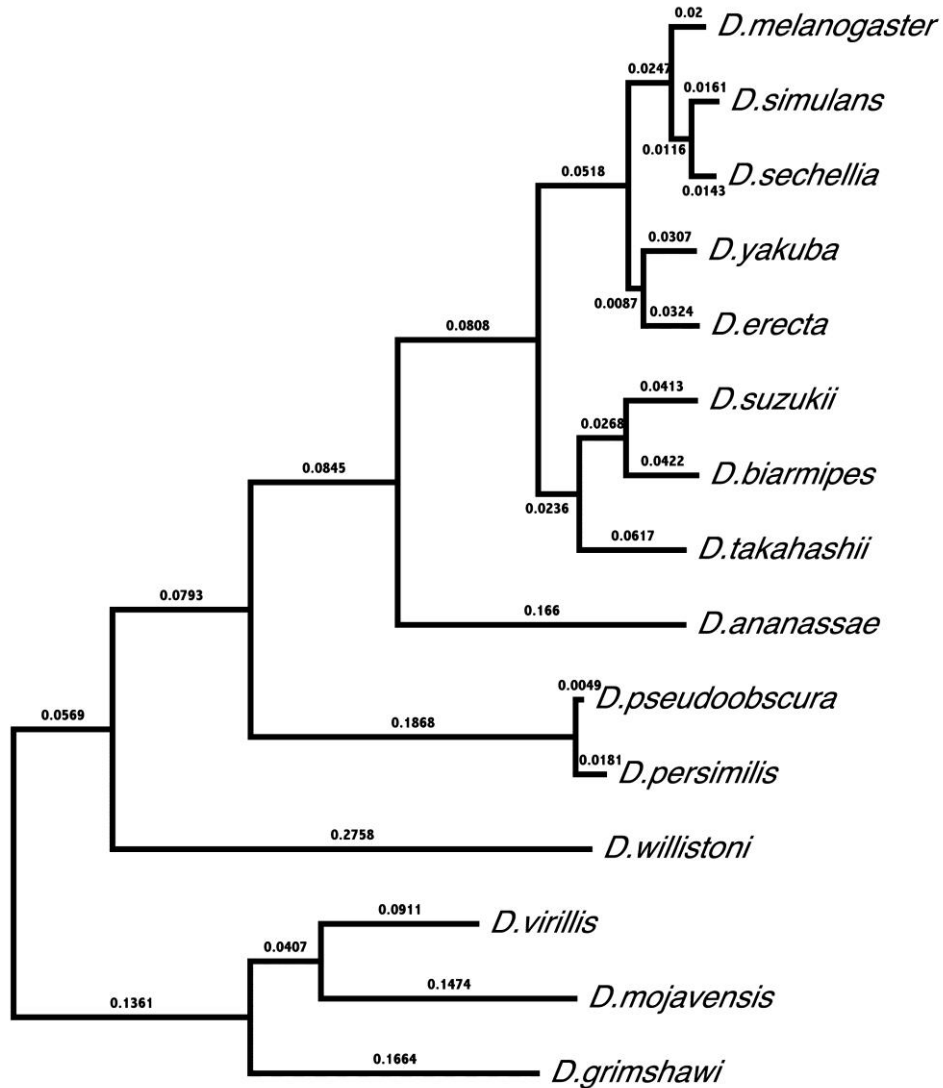

**Figure S3** Best-scoring maximum likelihood (ML) tree of 15 *Drosophila* species with outgroup *A. gambiae* (not shown) using 5,322 gene partitions with 5,199,249 sites. Best model was selected individually for each partition. Bootstrap support values from 250 bootstrap replicates are 100 for all nodes. Branch labels indicate the mean number of substitutions per site.
