# Supplementary material
Source: HighWire-hosted journal article supplement (https://www.g3journal.org/content/suppl/2013/10/17/g3.113.008185)
Supplement: TableS2.pdf [file TableS2.pdf]

**Table S2** *Drosophila suzukii* 17-k-mer statistics.

| <b>SPECIES</b>    | <b>K-MER</b> | <b>K-MER NUM</b> | <b>K-MER DEPTH</b> | <b>GENOME SIZE (BP)</b> | <b>SEQUENCE COVERAGE</b> |
|-------------------|--------------|------------------|--------------------|-------------------------|--------------------------|
| <i>D. suzukii</i> | 17           | 5,515,021,508    | 25                 | 220,600,860             | 30.07                    |
