# Supplementary material
Source: HighWire-hosted journal article supplement (https://www.g3journal.org/content/suppl/2013/10/17/g3.113.008185)
Supplement: TableS7.pdf [file TableS7.pdf]

**Table S7 GO term and functional classification enrichment analysis using DAVID for gene families that are expanded in the *Drosophila suzukii* genome as compared to 14 *Drosophila* species analyzed in this study.**

| CATEGORY <sup>a</sup>       | TERM                                                                 | COUNT <sup>b</sup> | P VALUE  | GENE FAMILIES: REPRESENTATIVE GENE SYMBOLS <sup>c</sup>                                              |
|-----------------------------|----------------------------------------------------------------------|--------------------|----------|------------------------------------------------------------------------------------------------------|
| <b>Annotation Cluster 1</b> | <b>Enrichment Score: 1.8103805538093147</b>                          |                    |          |                                                                                                      |
| GOTERM BP                   | GO:0006071 glycerol metabolic process                                | 3                  | 8.49E-03 | Gpdh, CG18135, Gyk                                                                                   |
| GOTERM BP                   | GO:0019400 alditol metabolic process                                 | 3                  | 8.49E-03 | Gpdh, CG18135, Gyk                                                                                   |
| GOTERM BP                   | GO:0019751 polyol metabolic process                                  | 3                  | 5.14E-02 | Gpdh, CG18135, Gyk                                                                                   |
| <b>Annotation Cluster 2</b> | <b>Enrichment Score: 1.7459845947230437</b>                          |                    |          |                                                                                                      |
| GOTERM BP                   | GO:0032268 regulation of cellular protein metabolic process          | 9                  | 3.85E-03 | Acp76A, PEK, Adam, mRpL11, Tollo, Spn77Bc, Su(var)205, nos, elav                                     |
| GOTERM BP                   | GO:0010605 negative regulation of macromolecule metabolic process    | 13                 | 4.11E-03 | WRNexo, Acp76A, mRpL11, Spn77Bc, Su(var)205, elav, mael, Hsc70-4, PEK, E(spl)m8-HLH, fkh, lolal, nos |
| GOTERM BP                   | GO:0032269 negative regulation of cellular protein metabolic process | 5                  | 1.36E-02 | Acp76A, PEK, Spn77Bc, nos, elav                                                                      |
| GOTERM BP                   | GO:0051248 negative regulation of protein metabolic process          | 5                  | 1.49E-02 | Acp76A, PEK, Spn77Bc, nos, elav                                                                      |
| SWISSPROT PIR               | translation regulation                                               | 3                  | 4.00E-02 | PEK, mRpL11, nos                                                                                     |

<sup>a</sup> Categories used in DAVID analysis include GO sub-ontologies for Biological Process (BP), Molecular Function (MF), and CC (Cellular Component), as well as keywords from SwissProt PIR (Protein Information Resource) and protein domains from the Interpro database.

<sup>b</sup> Count represents the number of gene families

<sup>c</sup> Gene symbol for representative, most highly annotated member of each gene family is shown. All annotations shown here are from *D. melanogaster*.

|                             |                                                              |    |          |                                                                                        |
|-----------------------------|--------------------------------------------------------------|----|----------|----------------------------------------------------------------------------------------|
| GOTERM BP                   | GO:0006417 regulation of translation                         | 5  | 4.84E-02 | PEK, Adam, mRpL11, nos, elav                                                           |
| GOTERM BP                   | GO:0010608 posttranscriptional regulation of gene expression | 6  | 9.66E-02 | Hsc70-4, PEK, Adam, mRpL11, nos, elav                                                  |
| <b>Annotation Cluster 3</b> | <b>Enrichment Score: 1.5795892033529708</b>                  |    |          |                                                                                        |
| SWISSPROT PIR               | Chaperone                                                    | 5  | 1.54E-02 | CG7394, CG11267, Cnx99A, Tcp-1zeta                                                     |
| GOTERM BP                   | GO:0006457 protein folding                                   | 6  | 2.69E-02 | Hsc70-4, CG11267, Cnx99A, Tcp-1zeta, FKBP59                                            |
| GOTERM MF                   | GO:0051082 unfolded protein binding                          | 5  | 4.40E-02 | Hsc70-4, CG11267, Cnx99A, Tcp-1zeta                                                    |
| <b>Annotation Cluster 4</b> | <b>Enrichment Score: 1.420233335387723</b>                   |    |          |                                                                                        |
| GOTERM BP                   | GO:0051606 detection of stimulus                             | 6  | 1.26E-02 | Or49a, Calx, CheB42a, Galphaq, FKBP59                                                  |
| SWISSPROT PIR               | sensory transduction                                         | 6  | 3.13E-02 | Or49a, Or69a, Galphaq, FKBP59, Or22a                                                   |
| GOTERM BP                   | GO:0009583 detection of light stimulus                       | 4  | 4.32E-02 | Calx, Galphaq, FKBP59                                                                  |
| GOTERM BP                   | GO:0009582 detection of abiotic stimulus                     | 4  | 6.20E-02 | Calx, Galphaq, FKBP59                                                                  |
| GOTERM BP                   | GO:0009581 detection of external stimulus                    | 4  | 7.48E-02 | Calx, Galphaq, FKBP59                                                                  |
| <b>Annotation Cluster 5</b> | <b>Enrichment Score: 1.3722382305056715</b>                  |    |          |                                                                                        |
| INTERPRO                    | IPR007087:Zinc finger, C2H2-type                             | 13 | 2.49E-02 | CG6689, term, CG1647, CG16779, CG10669, Meics, CG5316, CG4360, CG3065, CG11966, CG4318 |
| INTERPRO                    | IPR015880:Zinc finger, C2H2-like                             | 13 | 2.93E-02 | CG6689, CG1647, CG16779, CG10669, Meics, CG5316, CG4360, CG3065, CG11966, noi, CG4318  |

|                             |                                                                    |    |          |                                                                                                                      |
|-----------------------------|--------------------------------------------------------------------|----|----------|----------------------------------------------------------------------------------------------------------------------|
| INTERPRO                    | IPR012934:Zinc finger, AD-type                                     | 5  | 4.66E-02 | CG6689, CG1647, CG10669, Meics, CG4318                                                                               |
| INTERPRO                    | IPR013087:Zinc finger, C2H2-type/integrase,<br>DNA-binding         | 7  | 4.70E-02 | CG11966, CG6689, CG16779, CG10669, Meics, CG4360,<br>CG3065                                                          |
| SMART                       | SM00355:ZnF_C2H2                                                   | 13 | 8.63E-02 | CG6689, CG1647, CG16779, CG10669, Meics, CG5316,<br>CG4360, CG3065, CG11966, noi, CG4318                             |
| <b>Annotation Cluster 6</b> | <b>Enrichment Score: 1.2224866596583404</b>                        |    |          |                                                                                                                      |
| SWISSPROT PIR               | sensory transduction                                               | 6  | 3.13E-02 | Or49a, Or69a, Galphaq, FKBP59, Or22a                                                                                 |
| GOTERM MF                   | GO:0005549 odorant binding                                         | 6  | 3.17E-02 | Obp83ef, Or49a, Obp51a, CheB42a, Or69a, Or22a                                                                        |
| GOTERM BP                   | GO:0007186 G-protein coupled receptor<br>protein signaling pathway | 10 | 4.14E-02 | Or49a, Tk, D2R, Or69a, Galphaq, Gr85a, mth, Pk1r, Or22a                                                              |
| SWISSPROT PIR               | transducer                                                         | 8  | 4.29E-02 | Or49a, D2R, Or69a, Galphaq, Gr85a, mth, Pk1r, Or22a                                                                  |
| GOTERM BP                   | GO:0007600 sensory perception                                      | 9  | 5.60E-02 | Obp83ef, Or49a, Obp51a, Or69a, Galphaq, Gr85a, FKBP59,<br>Or22a                                                      |
| SWISSPROT PIR               | g-protein coupled receptor                                         | 7  | 8.04E-02 | Or49a, D2R, Or69a, Gr85a, mth, Pk1r, Or22a                                                                           |
| INTERPRO                    | IPR004117:Olfactory receptor, Drosophila                           | 3  | 8.44E-02 | Or49a, Or69a, Or22a                                                                                                  |
| GOTERM CC                   | GO:0005886 plasma membrane                                         | 17 | 9.45E-02 | D2R, Tollo, Or69a, Gr85a, Rac1, Cnx99A, Cad74A, Oscp, Pk1r,<br>Mical, Syn1, Or49a, Calx, Galphaq, mth, FKBP59, Or22a |
| PIR_SUPERFAMILY             | PIRSF008678:odorant receptor                                       | 3  | 9.64E-02 | Or49a, Or69a, Or22a                                                                                                  |
| GOTERM BP                   | GO:0050877 neurological system process                             | 14 | 9.76E-02 | Obp83ef, scramb1, Obp51a, cher, Or69a, Gr85a, Rac1, Hsc70-<br>4, Or49a, Galphaq, mth, FKBP59, Or22a                  |

| <b>Annotation Cluster 7</b> |                                                                                     | <b>Enrichment Score: 1.1978454386369843</b> |          |                                                           |  |
|-----------------------------|-------------------------------------------------------------------------------------|---------------------------------------------|----------|-----------------------------------------------------------|--|
| SWISSPROT PIR               | mitochondrion inner membrane                                                        | 5                                           | 1.41E-02 | CG7394, ATPsyn-d, ATPsyn-b, Oscp, CG9603                  |  |
| GOTERM CC                   | GO:0005753 mitochondrial proton-transporting ATP synthase complex                   | 3                                           | 5.02E-02 | ATPsyn-d, ATPsyn-b, Oscp                                  |  |
| SWISSPROT PIR               | Hydrogen ion transport                                                              | 3                                           | 5.21E-02 | ATPsyn-d, ATPsyn-b, Oscp                                  |  |
| GOTERM BP                   | GO:0009165 nucleotide biosynthetic process                                          | 6                                           | 5.54E-02 | ATPsyn-d, pug, CG6767, Ada, ATPsyn-b, Oscp                |  |
| GOTERM BP                   | GO:0009260 ribonucleotide biosynthetic process                                      | 5                                           | 5.67E-02 | ATPsyn-d, CG6767, Ada, ATPsyn-b, Oscp                     |  |
| GOTERM BP                   | GO:0009259 ribonucleotide metabolic process                                         | 5                                           | 6.27E-02 | ATPsyn-d, CG6767, Ada, ATPsyn-b, Oscp                     |  |
| GOTERM CC                   | GO:0045259 proton-transporting ATP synthase complex                                 | 3                                           | 6.31E-02 | ATPsyn-d, ATPsyn-b, Oscp                                  |  |
| GOTERM BP                   | GO:0034404 nucleobase, nucleoside and nucleotide biosynthetic process               | 6                                           | 7.04E-02 | ATPsyn-d, pug, CG6767, Ada, ATPsyn-b, Oscp                |  |
| GOTERM BP                   | GO:0034654 nucleobase, nucleoside, nucleotide and nucleic acid biosynthetic process | 6                                           | 7.04E-02 | ATPsyn-d, pug, CG6767, Ada, ATPsyn-b, Oscp                |  |
| GOTERM BP                   | GO:0044271 nitrogen compound biosynthetic process                                   | 8                                           | 7.82E-02 | ATPsyn-d, CG11899, pug, CG6767, Ada, ATPsyn-b, Odc1, Oscp |  |

|                             |                                             |                                              |    |          |                                                                                                |
|-----------------------------|---------------------------------------------|----------------------------------------------|----|----------|------------------------------------------------------------------------------------------------|
| GOTERM BP                   | GO:0006164                                  | purine nucleotide biosynthetic process       | 5  | 8.25E-02 | ATPsyn-d, pug, Ada, ATPsyn-b, Oscp                                                             |
| GOTERM CC                   | GO:0044455                                  | mitochondrial membrane part                  | 6  | 8.29E-02 | CG7394, ATPsyn-d, CG4769, ATPsyn-b, Oscp, CG9603                                               |
| GOTERM BP                   | GO:0006163                                  | purine nucleotide metabolic process          | 5  | 9.34E-02 | ATPsyn-d, pug, Ada, ATPsyn-b, Oscp                                                             |
| GOTERM CC                   | GO:0044429                                  | mitochondrial part                           | 12 | 9.70E-02 | CG7394, ATPsyn-d, mRpL11, CG4769, ATPsyn-b, Hmt-1, Dic1, CG11267, CG9547, mRpL20, Oscp, CG9603 |
| GOTERM CC                   | GO:0005743                                  | mitochondrial inner membrane                 | 7  | 9.76E-02 | CG7394, ATPsyn-d, CG4769, ATPsyn-b, Hmt-1, Oscp, CG9603                                        |
| <b>Annotation Cluster 8</b> | <b>Enrichment Score: 1.1438990309544648</b> |                                              |    |          |                                                                                                |
| GOTERM MF                   | GO:0004867                                  | serine-type endopeptidase inhibitor activity | 4  | 4.68E-02 | Acp76A, CG31515, Spn77Bc, CG3604                                                               |
| GOTERM MF                   | GO:0004866                                  | endopeptidase inhibitor activity             | 4  | 8.08E-02 | Acp76A, CG31515, Spn77Bc, CG3604                                                               |
| GOTERM MF                   | GO:0030414                                  | peptidase inhibitor activity                 | 4  | 9.79E-02 | Acp76A, CG31515, Spn77Bc, CG3604                                                               |

---
